# Supplementary material
Source: publisher figshare collection journal article supplement (https://acs.figshare.com/ndownloader/files/27424592)
Supplement: Supplementary file 1 [file 27424592]

**Effect of Temperature on  $^1\text{H}$  NMR Spectra, Antitrypanosomal Activity, Conformational Analysis and, Molecular Docking of Curine Derivatives from *Berberis brevissima*.**

*Saqib Ali<sup>†\*</sup>, Mamoon Ur Rashid<sup>‡</sup>, Muhammad Alamzeb<sup>†</sup>, William N. Setzer<sup>§</sup>*

<sup>†</sup>Department of Chemistry, Faculty of Sciences, University of Kotli, Azad Jammu and Kashmir-11100, Pakistan; [saqibali.chem@gmail.com](mailto:saqibali.chem@gmail.com); [zebchemist@gmail.com](mailto:zebchemist@gmail.com)

<sup>‡</sup>Laboratory of Theoretical and Computational Biophysics, Ton Duc Thang University, Ho Chi Minh City-729000, Vietnam

Faculty of Applied Sciences, Ton Duc Thang University, Ho Chi Minh City-729000, Vietnam;  
[mamoon.urrashid@tdtu.edu.vn](mailto:mamoon.urrashid@tdtu.edu.vn)

<sup>§</sup>Department of Chemistry, University of Alabama in Huntsville, Huntsville, AL 35899, USA;  
[wsetzer@chemistry.uah.edu](mailto:wsetzer@chemistry.uah.edu)

## Table of Contents

| No.                                                                                                                                                                       | Page |
|---------------------------------------------------------------------------------------------------------------------------------------------------------------------------|------|
| <b>Figure S1.</b> General Scheme for the Extraction and Fractionation of the Roots of <i>Berberis brevissima</i>                                                          | 3    |
| <b>Figure S2.</b> Scheme for the Isolation of Curine Alkaloids from the Alkaloid Fraction of <i>Berberis brevissima</i> Roots.                                            | 4    |
| <b>Figure S3:</b> <sup>1</sup> H-NMR Spectrum of Chondrofoline ( <b>1</b> ) in CDCl <sub>3</sub> at 25 °C                                                                 | 5    |
| <b>Figure S4:</b> <sup>1</sup> H-NMR Spectrum of Chondrofoline ( <b>1</b> ) in DMSO at 40 °C                                                                              | 6    |
| <b>Figure S5:</b> <sup>1</sup> H-NMR Spectrum of Chondrofoline ( <b>1</b> ) in DMSO at 60 °C                                                                              | 7    |
| <b>Figure S6:</b> <sup>1</sup> H-NMR Spectrum of Chondrofoline ( <b>1</b> ) in DMSO at 80 °C                                                                              | 8    |
| <b>Figure S7:</b> <sup>1</sup> H-NMR Spectrum of 13-Nitrochondrofoline ( <b>3</b> ) in DMSO at 25 °C                                                                      | 9    |
| <b>Figure S8:</b> <sup>1</sup> H-NMR Spectrum of 13-Nitrochondrofoline ( <b>3</b> ) in DMSO at 60 °C                                                                      | 10   |
| <b>Figure S9:</b> <sup>1</sup> H-NMR Spectrum of 13-Nitrochondrofoline ( <b>3</b> ) in DMSO at 80 °C                                                                      | 11   |
| <b>Figure S10:</b> FTMS, ESIMS Spectrum of Chondrofoline ( <b>1</b> )                                                                                                     | 12   |
| <b>Figure S11:</b> <sup>13</sup> C-NMR Spectrum of Chondrofoline ( <b>1</b> )                                                                                             | 13   |
| <b>Figure S12:</b> HSQC Spectrum of Chondrofoline ( <b>1</b> )                                                                                                            | 14   |
| <b>Figure S13:</b> LCMS, FTMS, ESIMS Spectrum of 13-Nitrochondrofoline ( <b>3</b> )                                                                                       | 15   |
| <b>Figure S14:</b> UV-Visible Spectrum of 13-Nitrochondrofoline ( <b>3</b> )                                                                                              | 16   |
| <b>Figure S15:</b> FTIR Spectrum of 13-Nitrochondrofoline ( <b>3</b> )                                                                                                    | 17   |
| <b>Figure S16:</b> <sup>13</sup> C-NMR Spectrum of 13-Nitrochondrofoline ( <b>3</b> )                                                                                     | 18   |
| <b>Figure S17:</b> HSQC Spectrum of 13-Nitrochondrofoline ( <b>3</b> )                                                                                                    | 19   |
| <b>Figure S18:</b> FTMS, ESIMS Spectrum of <i>O</i> -Acetylchondrofoline ( <b>2</b> )                                                                                     | 20   |
| <b>Figure S19:</b> <sup>1</sup> H-NMR Spectrum of <i>O</i> -Acetylchondrofoline ( <b>2</b> )                                                                              | 21   |
| <b>Figure S20:</b> <sup>1</sup> H-NMR Spectrum of Curine ( <b>4</b> ) in CDCl <sub>3</sub> at 25 °C                                                                       | 22   |
| <b>Figure S21:</b> <sup>13</sup> C-NMR Spectrum of Curine ( <b>4</b> ) in CDCl <sub>3</sub> at 25 °C                                                                      | 23   |
| <b>Figure S22:</b> HMBC Spectrum of Curine ( <b>4</b> ) in CDCl <sub>3</sub> at 25 °C                                                                                     | 24   |
| <b>Figure S23:</b> The <sup>1</sup> H-NMR spectrum of 13-nitrochondrofoline ( <b>2</b> ) in CHCl <sub>3</sub> at 25 °C showing two conformers one major while other minor | 25   |

## Figures

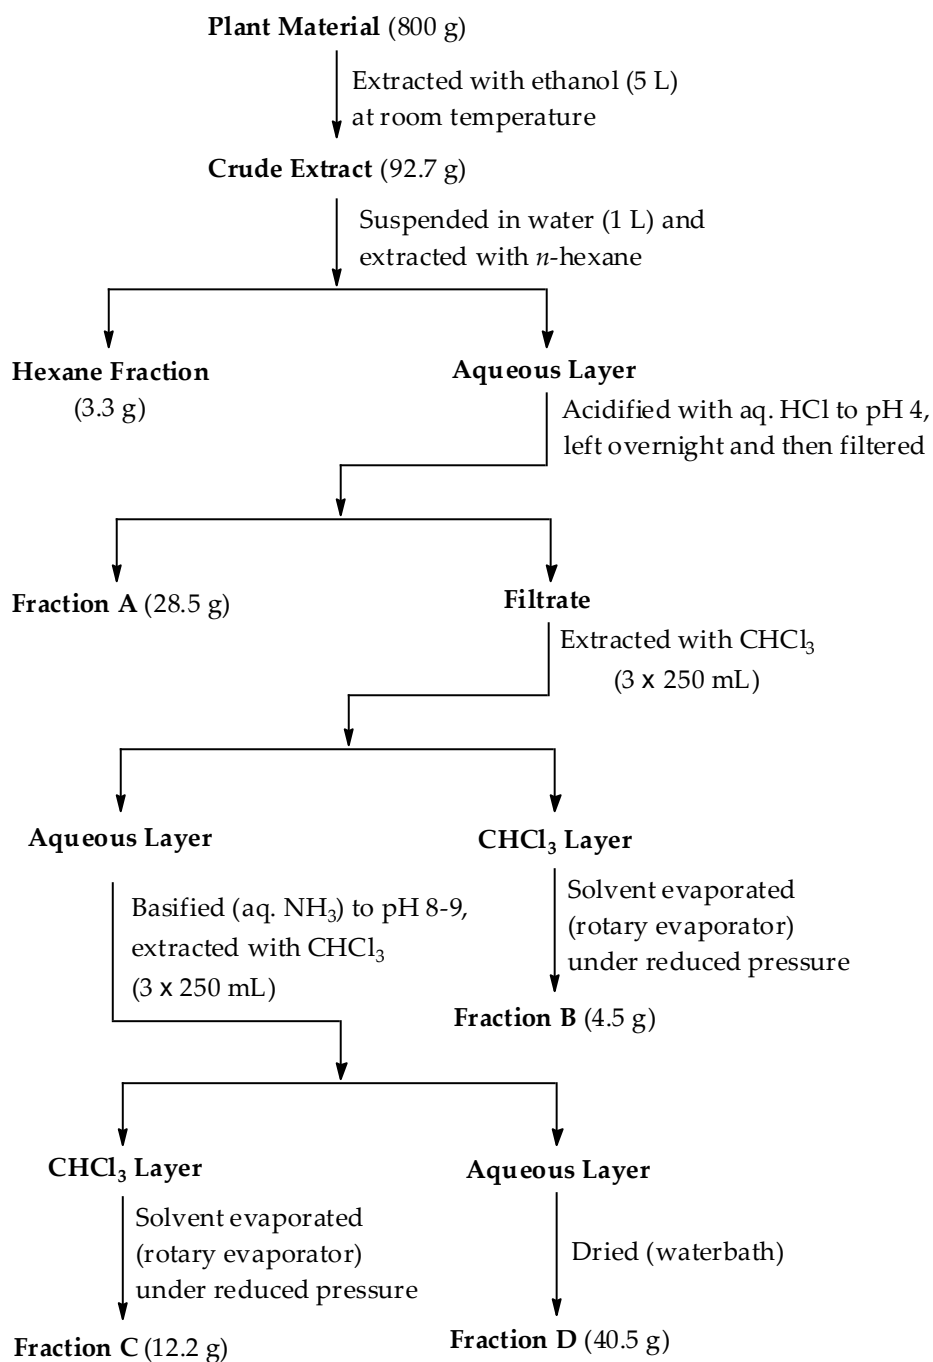

**Figure S1.** General scheme for the extraction and fractionation of the roots of *Berberis brevissima* Jafri.

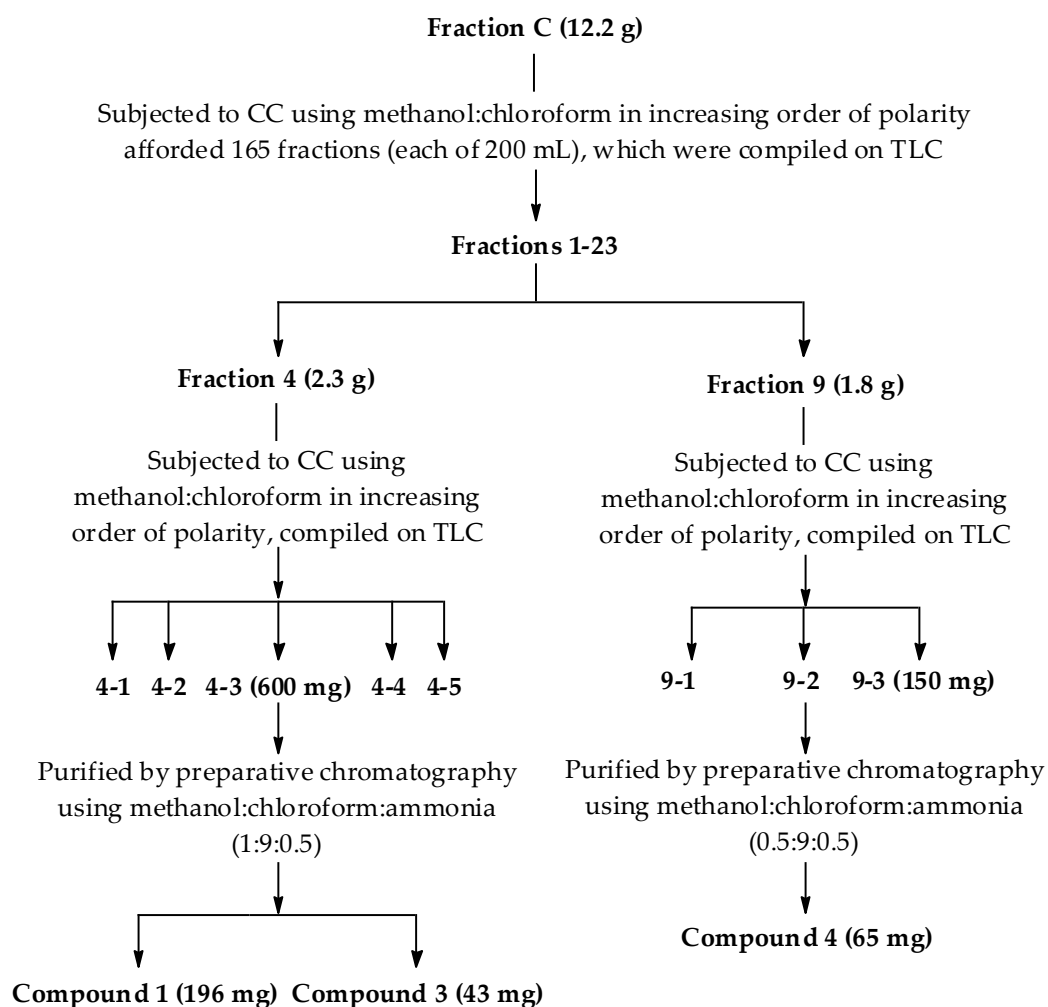

**Figure S2.** Scheme for the isolation of curine alkaloids from the alkaloid fraction of *Berberis brevissima* roots.

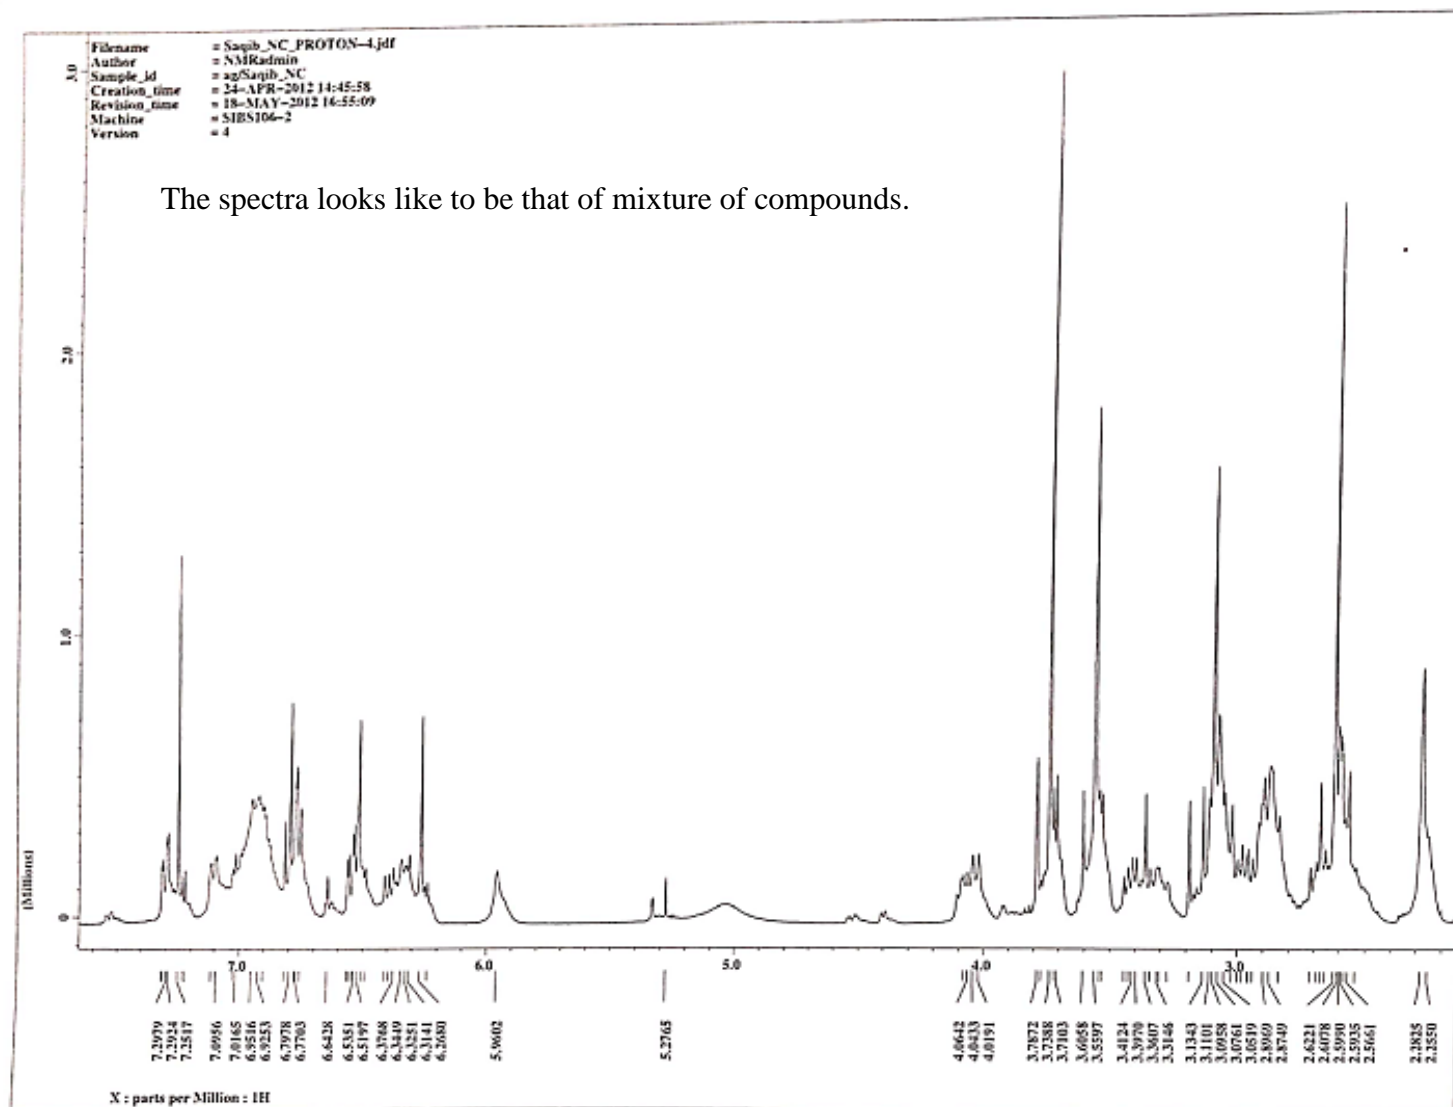

Figure S3.  $^1\text{H}$ -NMR Spectrum of Chondrofoline (**1**) in  $\text{CDCl}_3$  at  $25^\circ\text{C}$

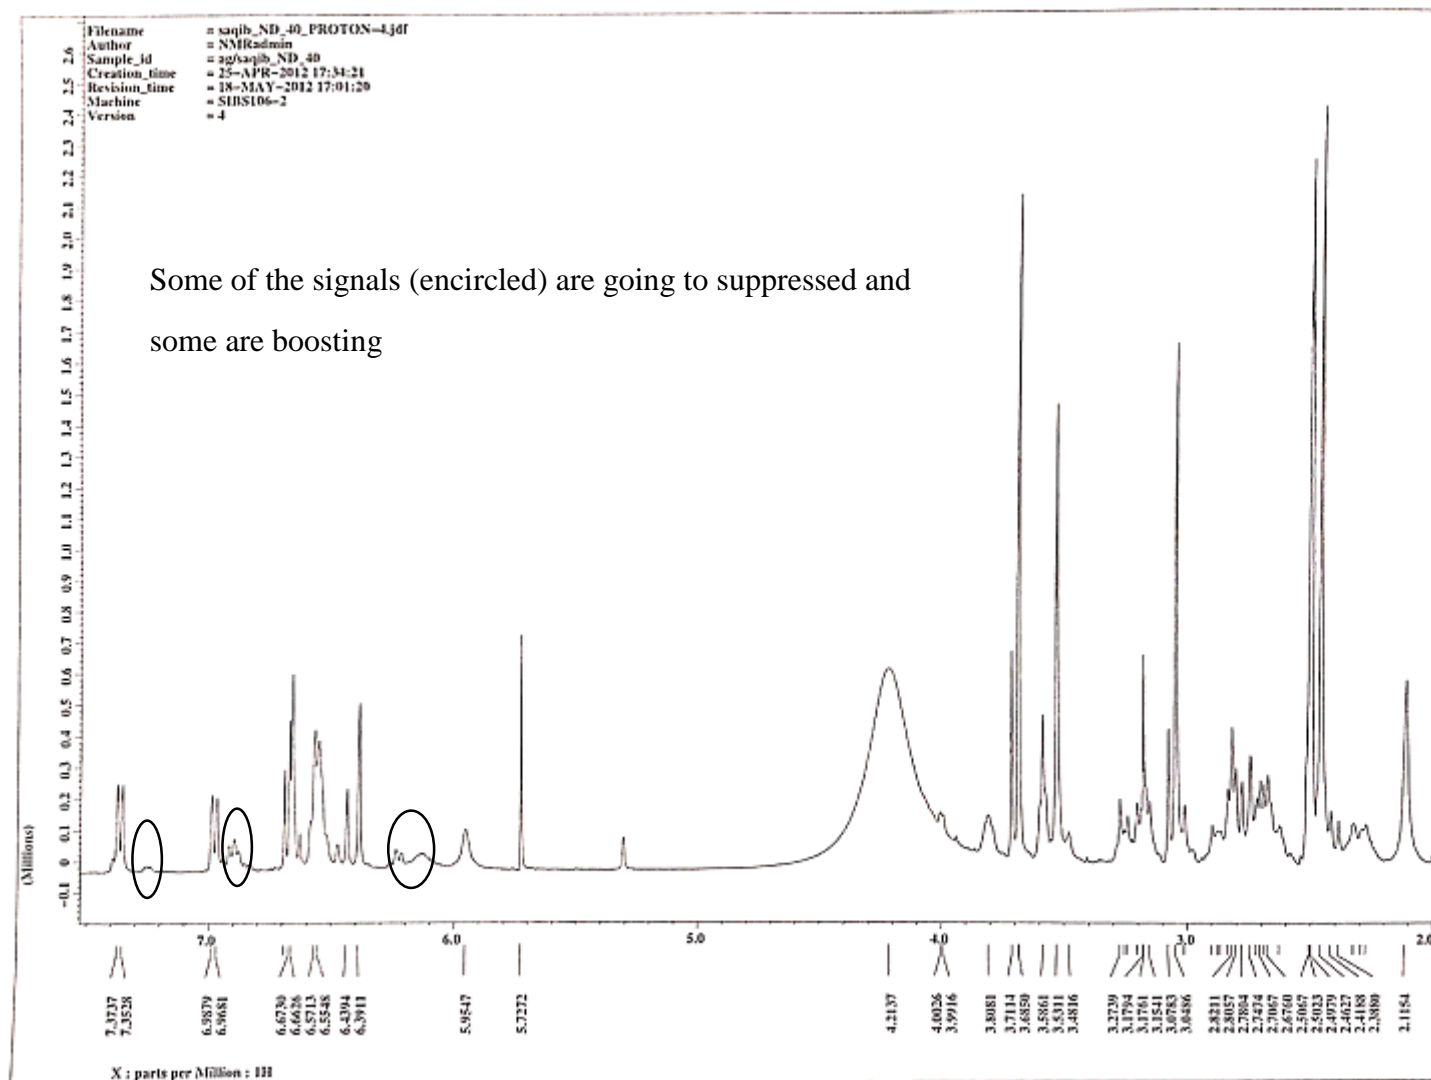

Figure S4.  $^1\text{H}$ -NMR Spectrum of Chondrofoline (**1**) in DMSO at 40 °C

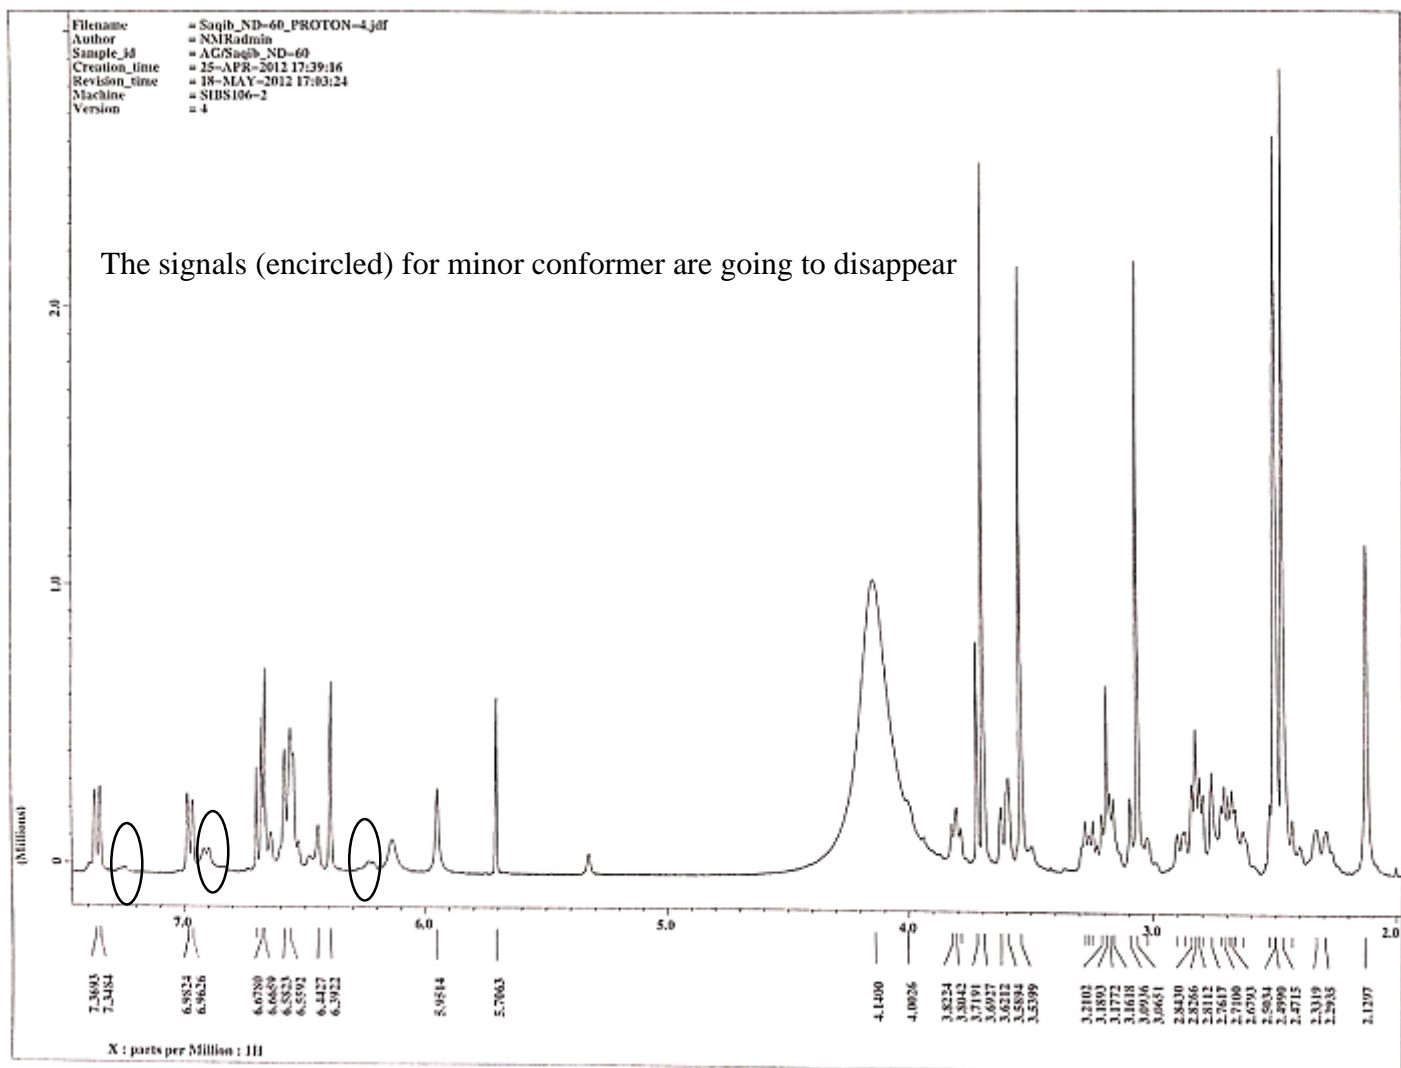

**Figure S5.**  $^1\text{H}$ -NMR Spectrum of Chondrofoline (**1**) in DMSO at 60 °C



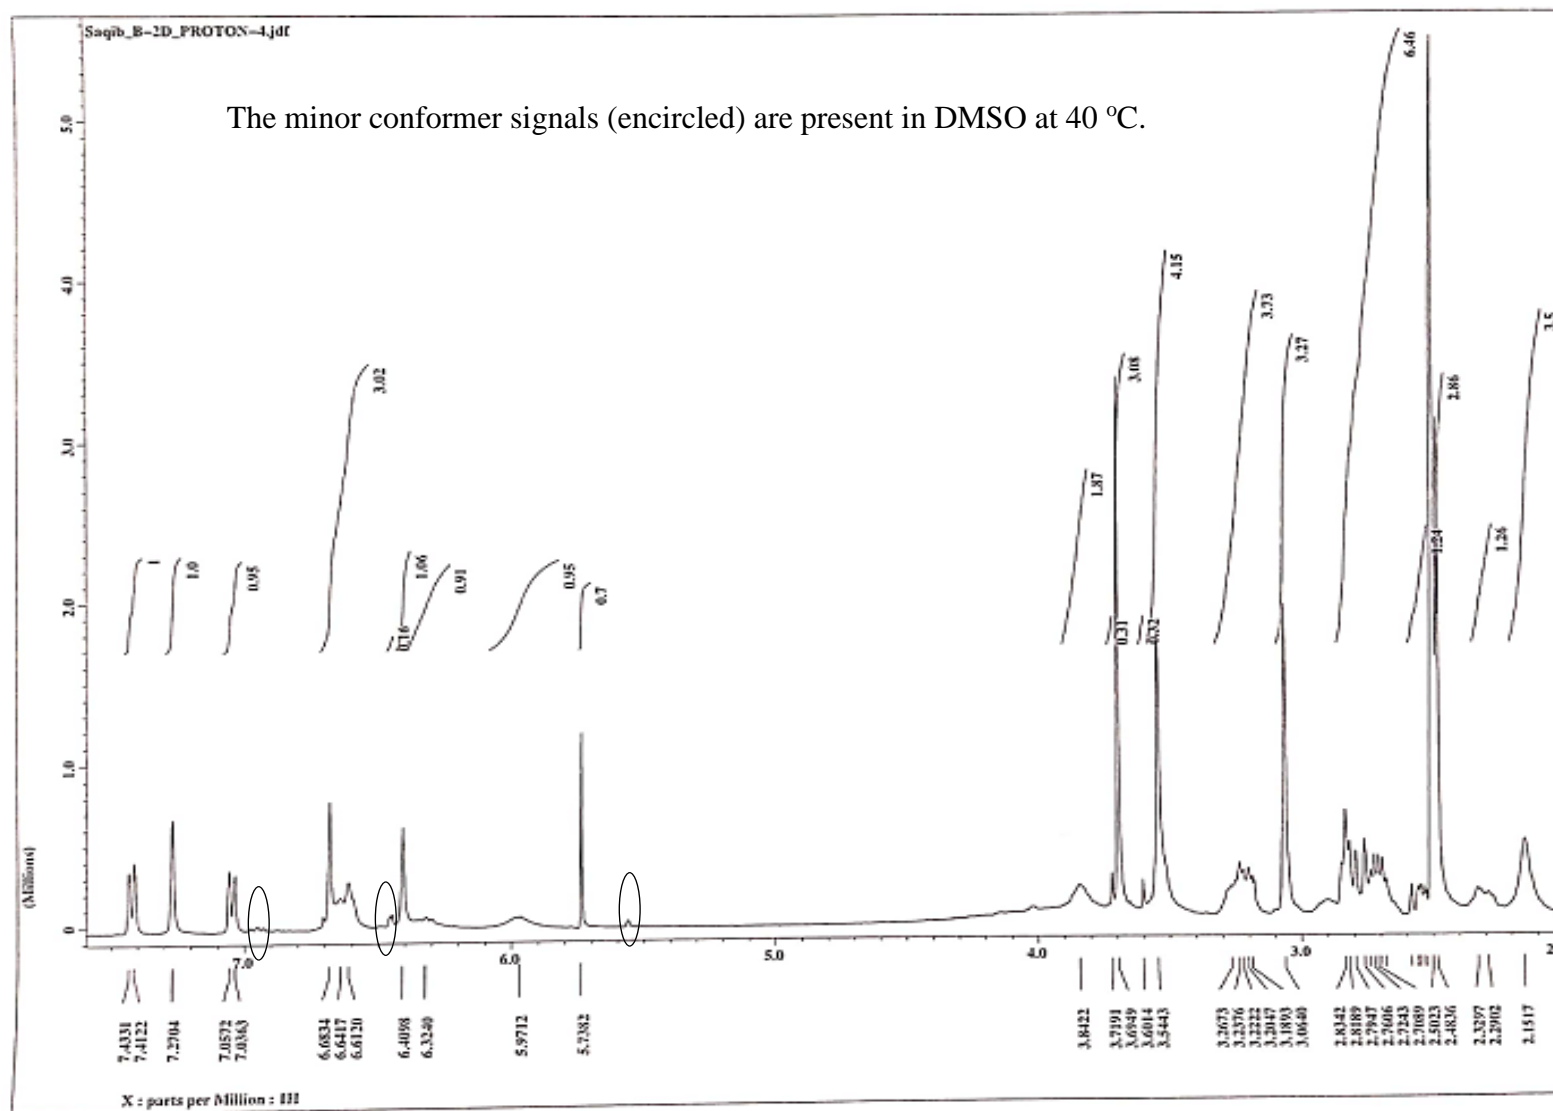

**Figure S7:** The  $^1\text{H}$ -NMR spectrum of 13-nitrochondrofoline (**2**) in DMSO at 40 °C

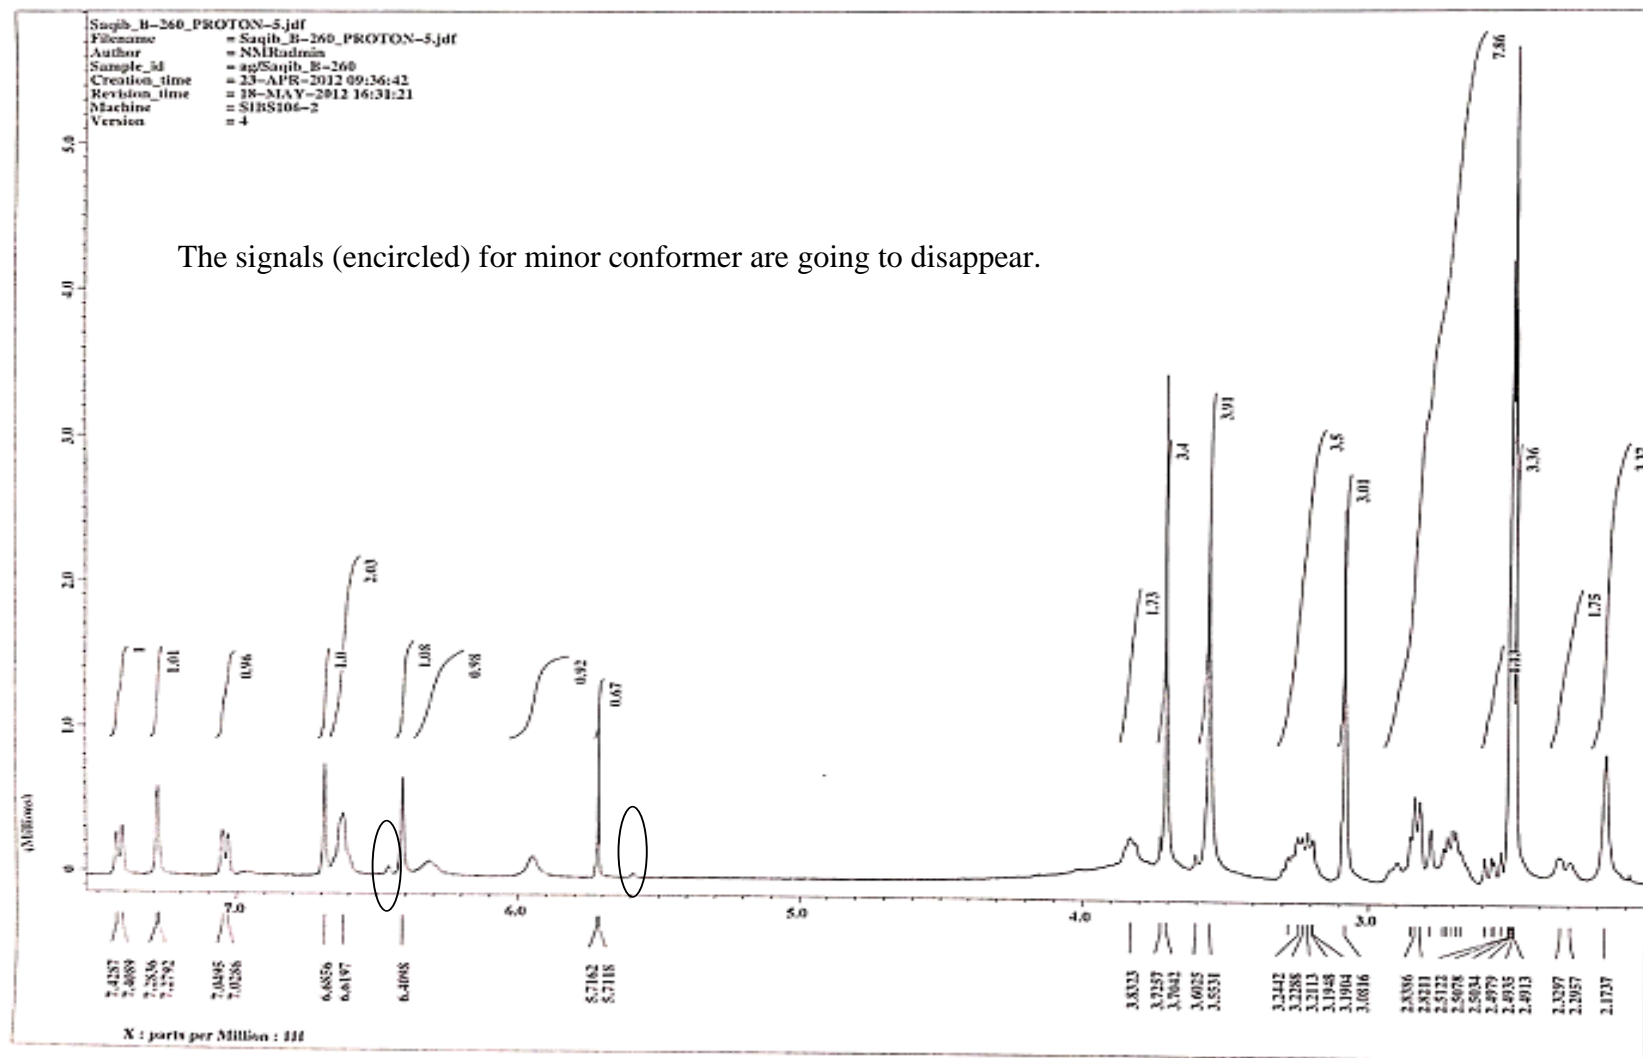

**Figure S8:** The  $^1\text{H}$ -NMR spectrum of 13-nitrochondrofoline (**2**) in DMSO at 60 °C

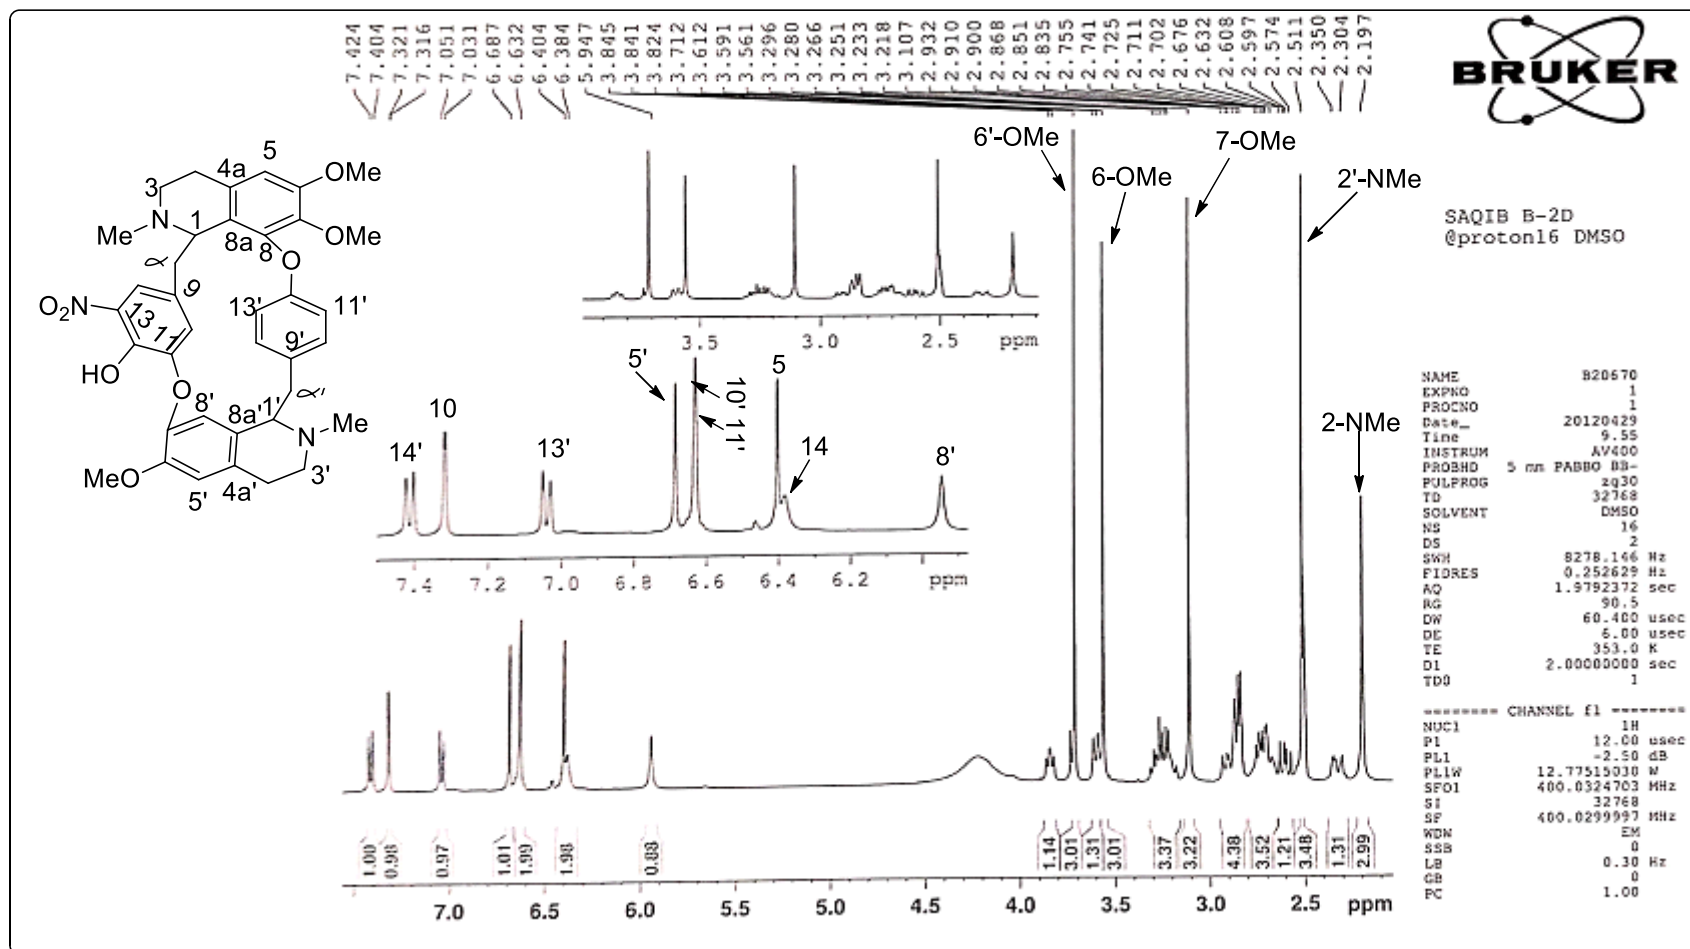

**Figure S9:** The <sup>1</sup>H-NMR spectrum of 13-nitrochondrofoline (**2**) in DMSO at 80 °C

ND-80 #85 RT: 2.87 AV: 1 NL: 7.52E7

T: FTMS (1,1) + p ESI Full lock ms [35.00-1200.00]

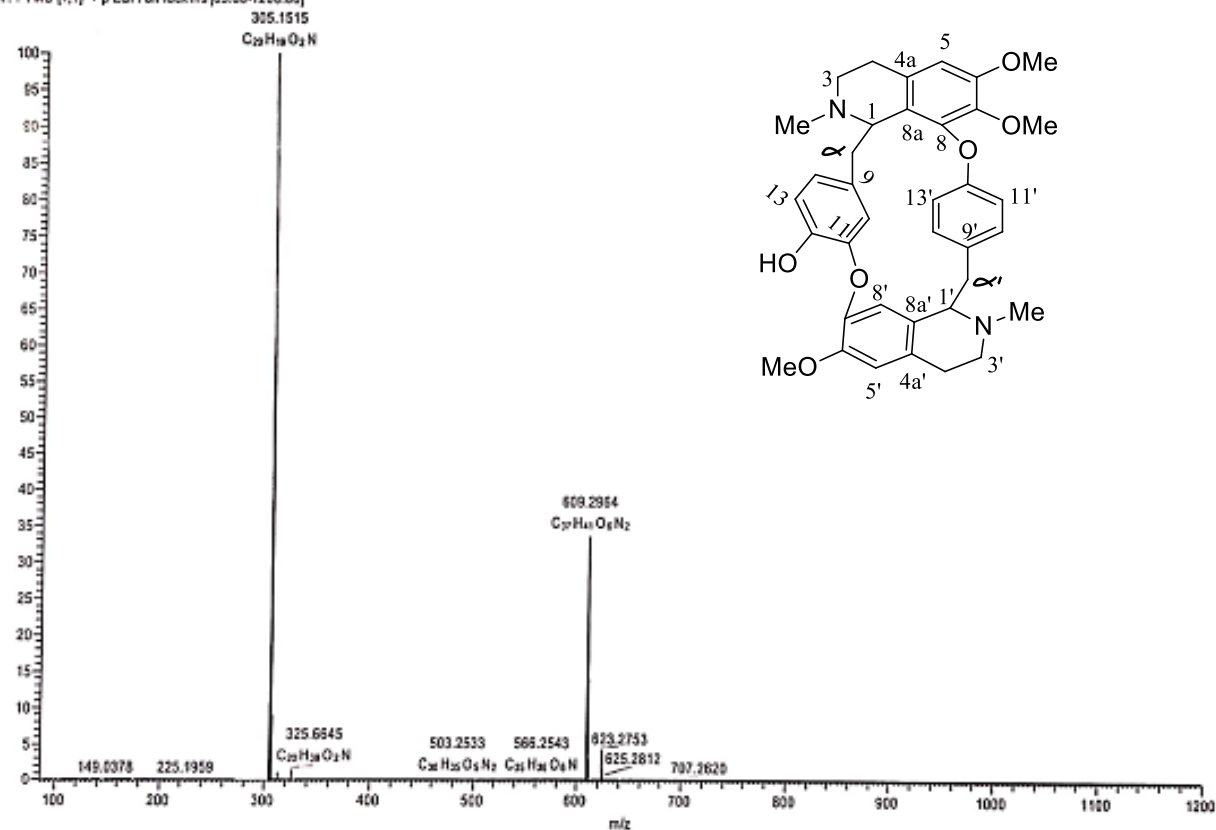**Figure S10: FTMS, ESIMS Spectrum of Chondrofoline (1)**

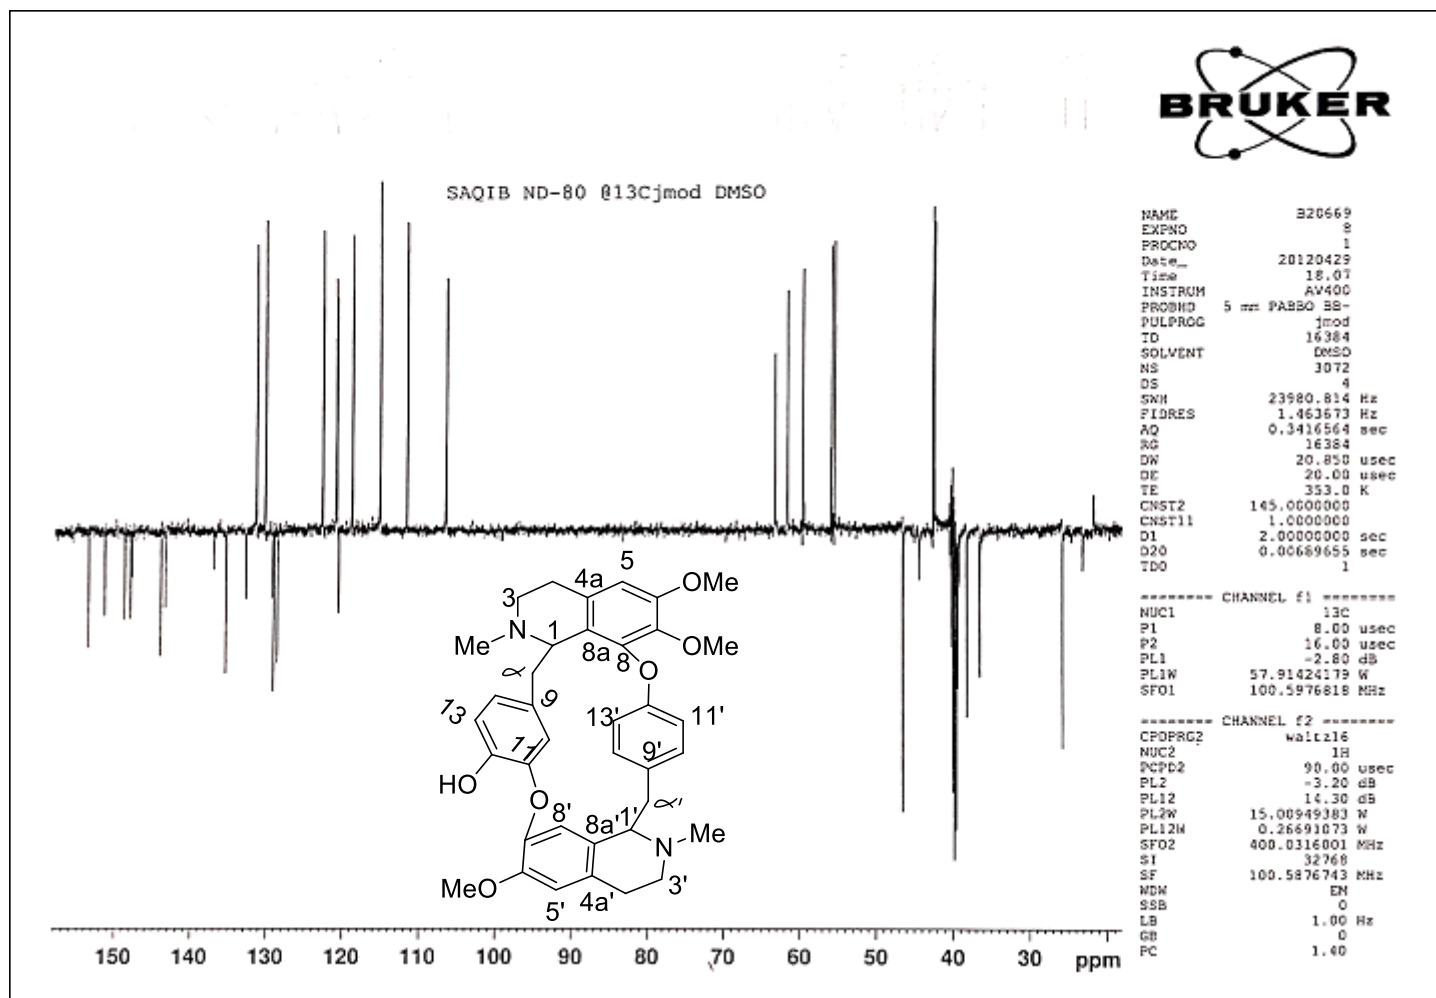

**Figure S11:**  $^{13}\text{C}$ -NMR Spectrum of Chondrofoline (1) in DMSO at 80 °C

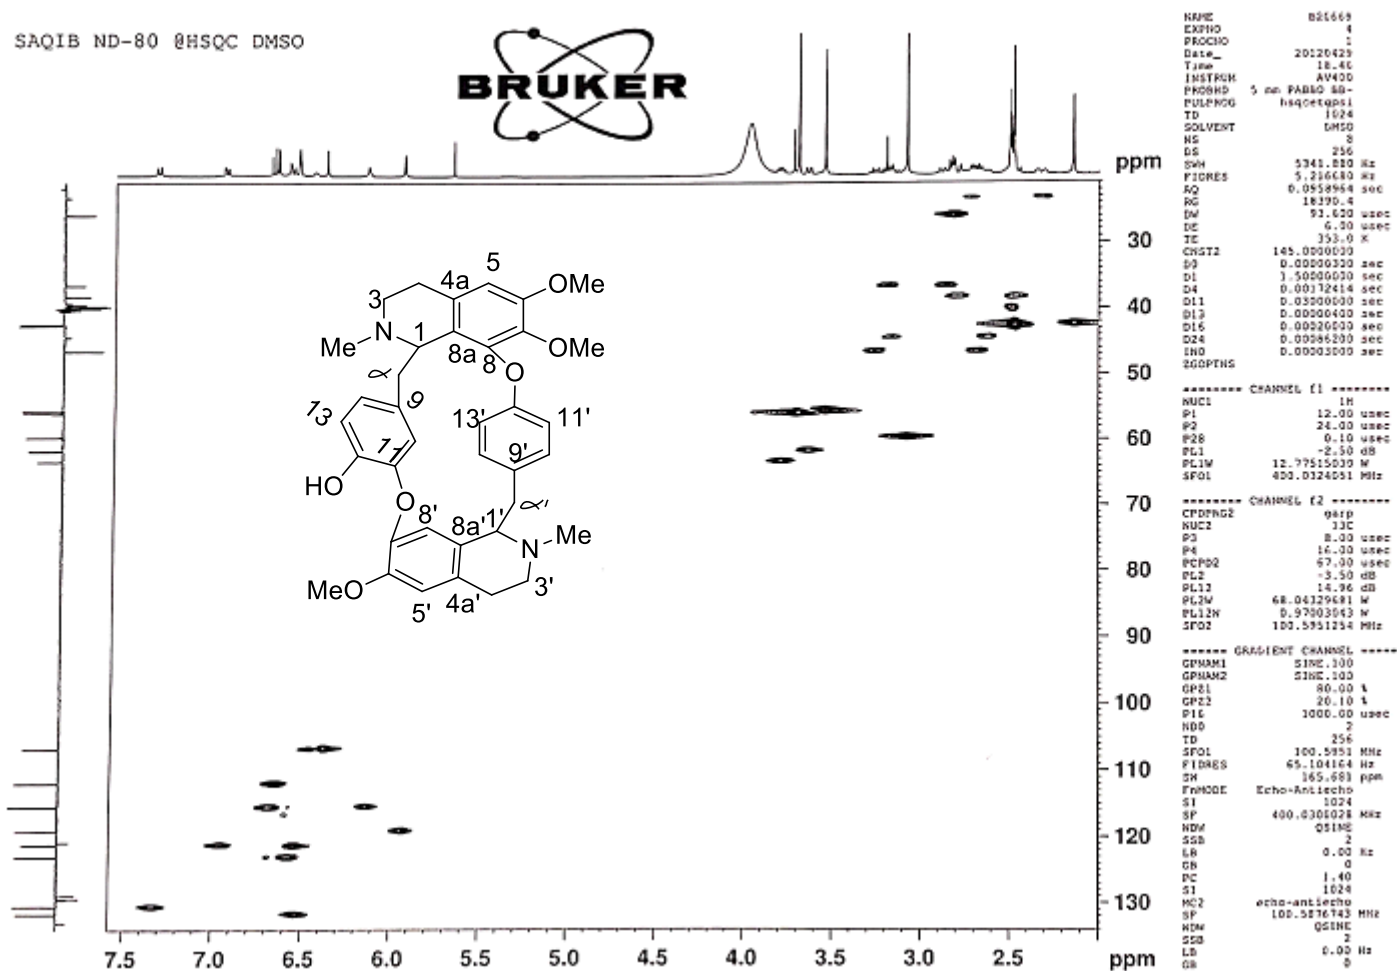

B-2D\_01 #1-66 RT: 0.00-1.13 AV: 49 NL: 2.34E8  
 F: FTMS + p ESI Full ms [75.00-2000.00]

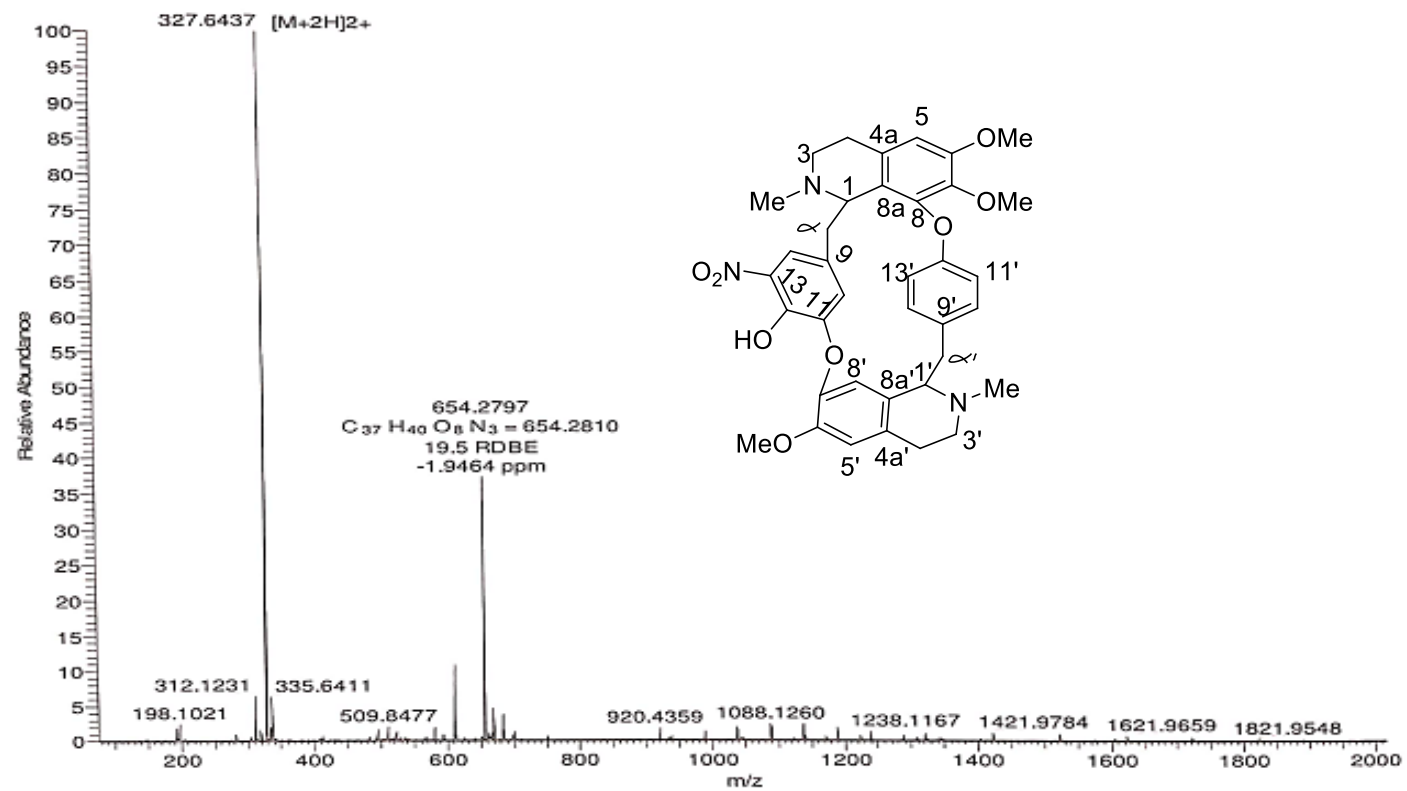

**Figure S13:** FTMS, ESIMS Spectrum of 13-nitrochondrofoline (**2**)

# THERMO SPECTRONIC ~ VISION32 SOFTWARE V1.25

Operator Name Saqib Ali  
 Department SIPBS  
 Organisation University of Strathclyde  
 Information MeOH 0.15mg/10ml  
 Date of Report 01/01/2001  
 Time of Report 00:50:30

## Scan Graph

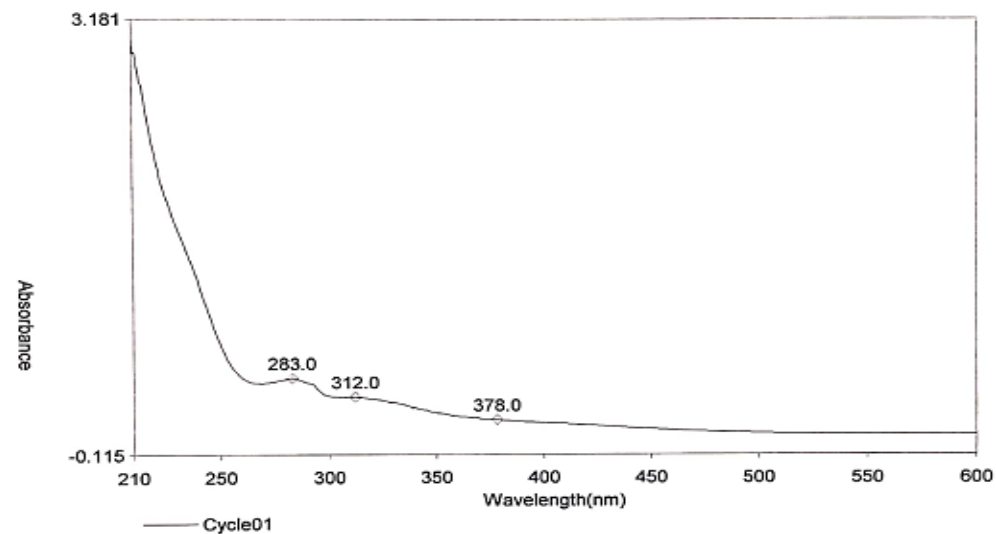

**Results Table - ND-80 A pt15mg-mL.sre,B-02D A,Cycle01**

| nm     | A     | Peak Pick Method            |
|--------|-------|-----------------------------|
| 283.00 | 0.467 | Find 8 Peaks Above 0.0000 A |
| 312.00 | 0.325 | Start Lambda 210.0 nm       |
| 378.00 | 0.148 | Stop Lambda 600.0 nm        |
|        |       | Sort By Wavelength          |

Sensitivity Auto

Description MeOH 0.15mg/mL

Date Collected 01/01/2001 Time Collected 00:42:48

Operator Name Saqib Ali Instrument ID 093302

**Manipulations**

Manipulation 1 Convert to Absorbance

Date Performed 01/01/2001 Time Performed 00:42:49

**Figure S14:** UV-Visible spectra of 13-nitrochondrofoline (2)

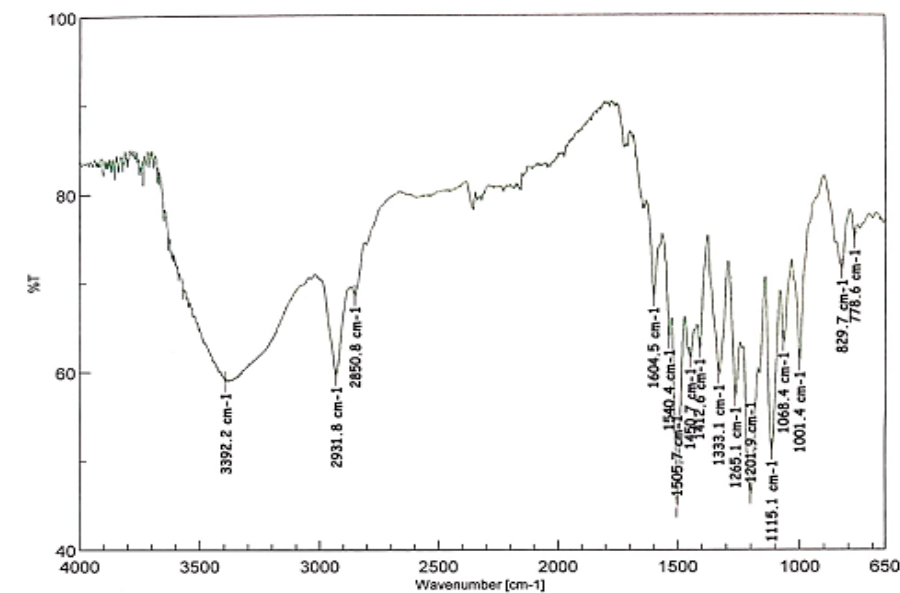

[Comment]  
 Sample Name B-02D  
 Comment ATR  
 User  
 Division  
 Company University of Strathclyde

B-02D ATR CORR

|                           |                  |                    |                   |
|---------------------------|------------------|--------------------|-------------------|
| [Measurement Information] |                  | [Data Information] |                   |
| Model Name                | FT/IR-4200typeA  | Creation Date      | 02/07/2012 14:28  |
| Serial Number             | B000261018       | Data array type    | Linear data array |
|                           |                  | Horizontal         | Wavenumber [cm-1] |
|                           |                  | Vertical           | %T                |
| Accessory                 | MIRacle          | Start              | 649.893 cm-1      |
| Accessory S/N             | 13871            | End                | 4000.12 cm-1      |
| Light Source              | Standard         | Data pitch         | 0.482117 cm-1     |
| Detector                  | TGS              | Data points        | 6950              |
| Accumulation              | 50               |                    |                   |
| Resolution                | 2 cm-1           |                    |                   |
| Zero Filling              | On               |                    |                   |
| Apodization               | 3-Sigma Gaussian |                    |                   |
| Gain                      | Auto (8)         |                    |                   |
| Aperture                  | 3.5 mm           |                    |                   |
| Scanning Speed            | 1 mm/sec         |                    |                   |
| Filter                    | Auto (30000 Hz)  |                    |                   |

**Figure S15:** FT-IR spectra of 13-nitrochondrofoline (2)

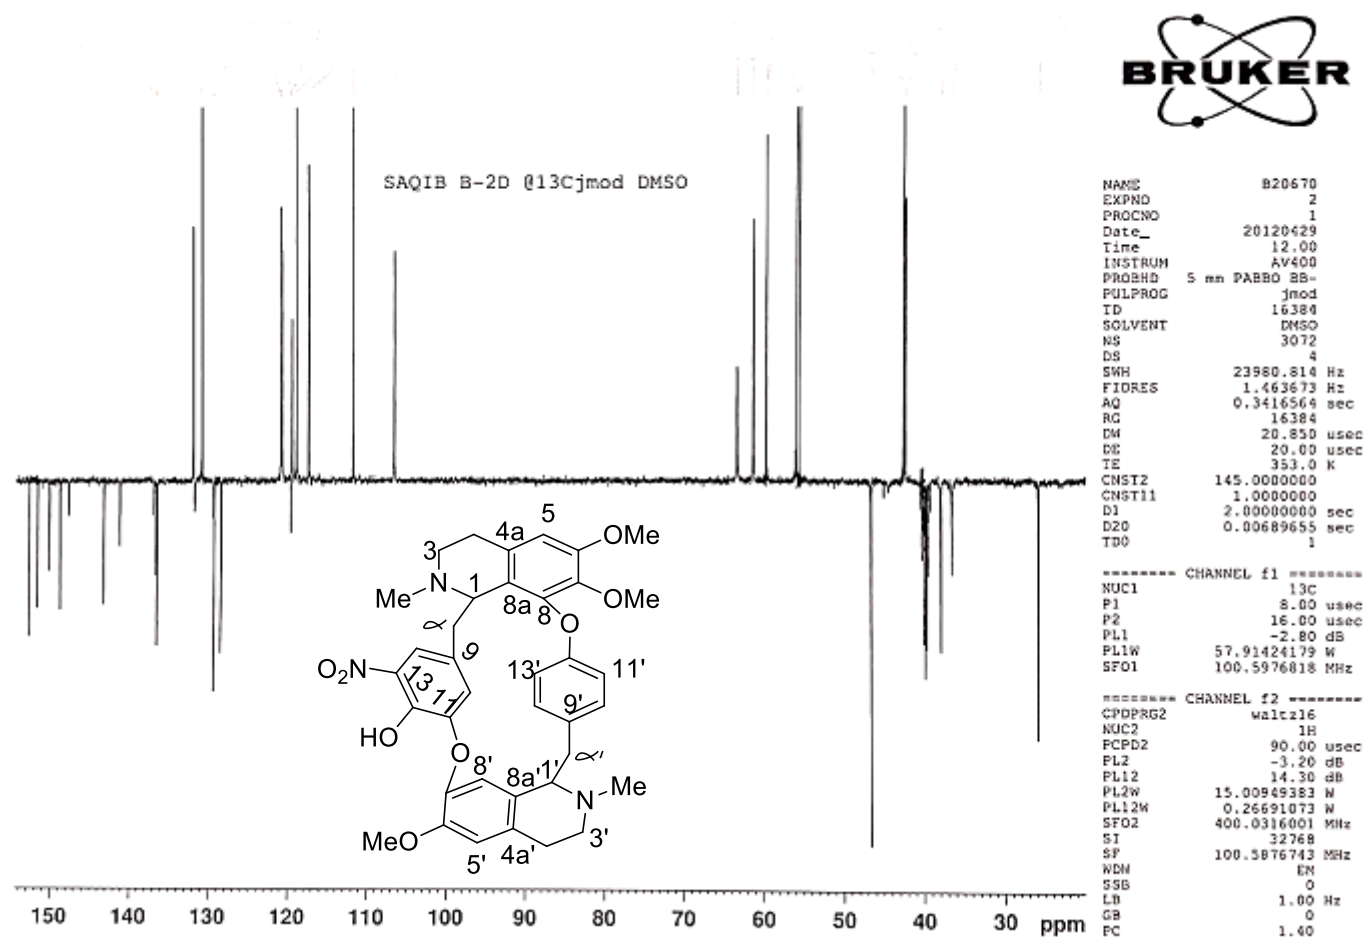

**Figure S16:**  $^{13}\text{C}$ -NMR Spectrum of 13-niteochondrofoline (2) in DMSO at 80 °C



C:\Xcalibur\...120120718\ND-80Ac

18/07/2012 13:00:02

ND-80Ac #69 RT: 2.01 AV: 1 NL: 4.35E6  
F: FTMS + c ESI Full ms [50.00-1200.00]

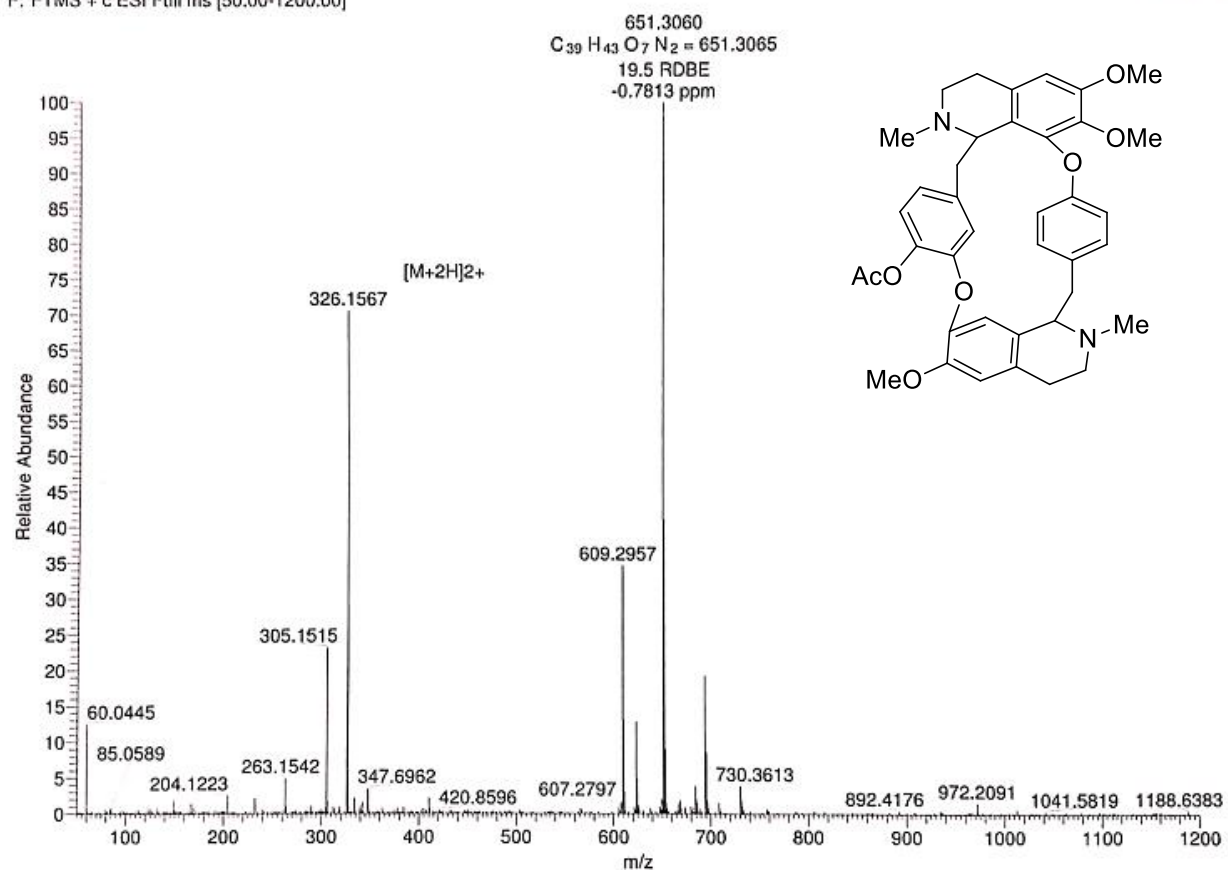

Figure S18: FTMS, ESIMS Spectrum of O-acetylchondrofoline (3)

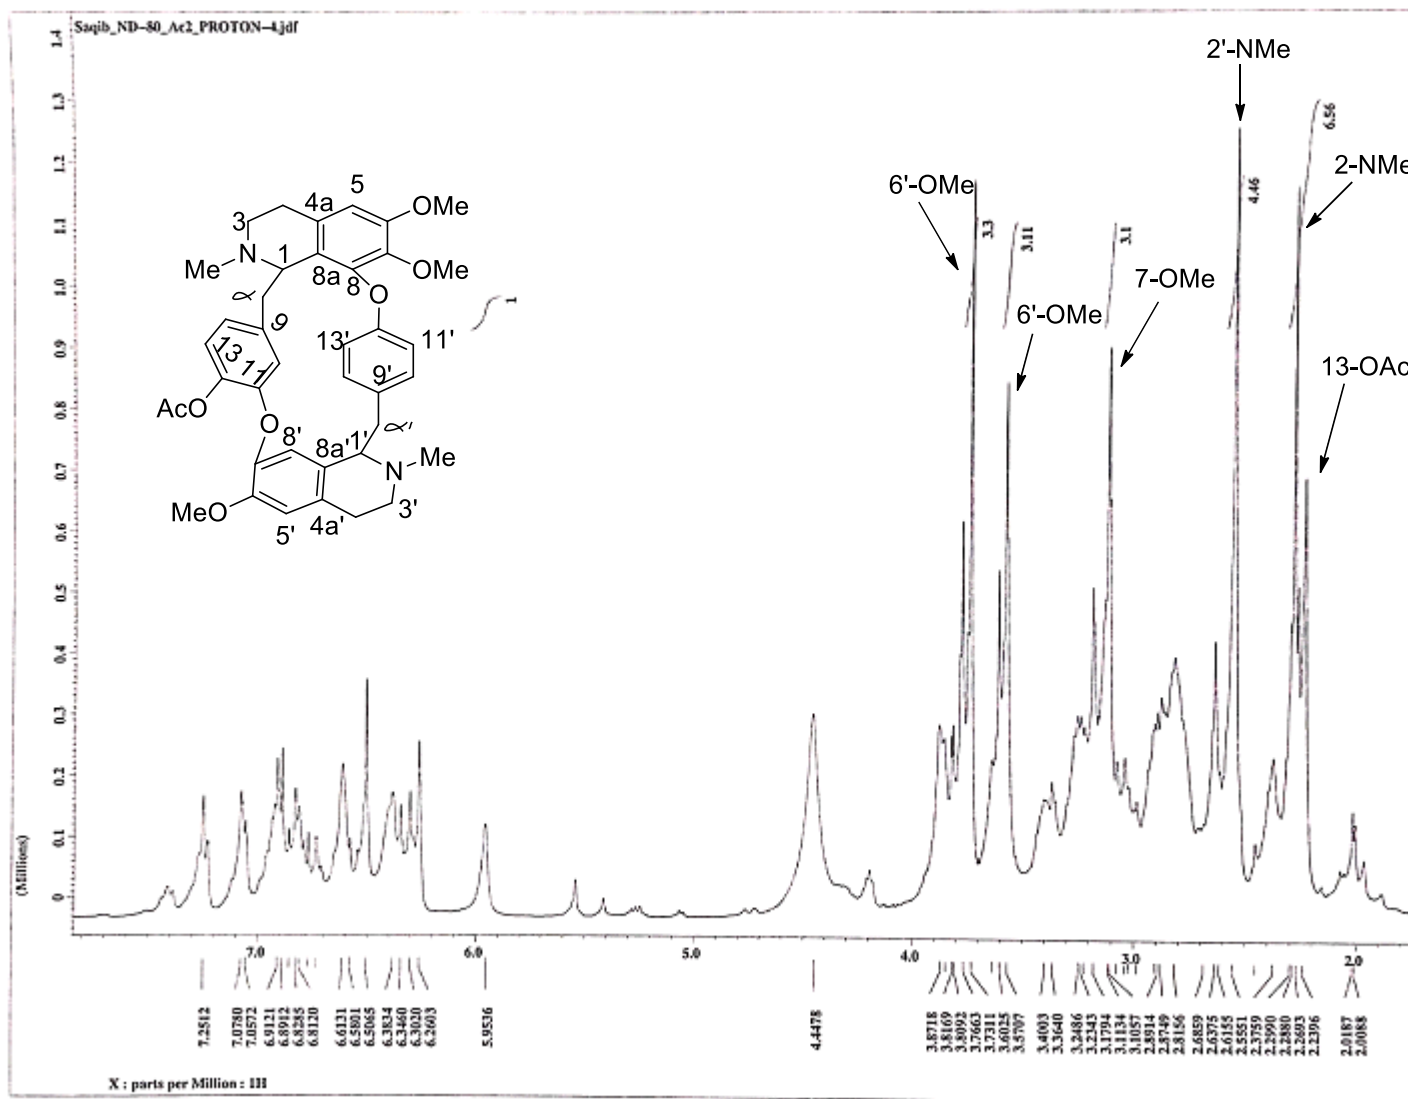

**Figure S19:**  $^1\text{H}$ -NMR Spectrum of O-acetylchondrofoline (3)

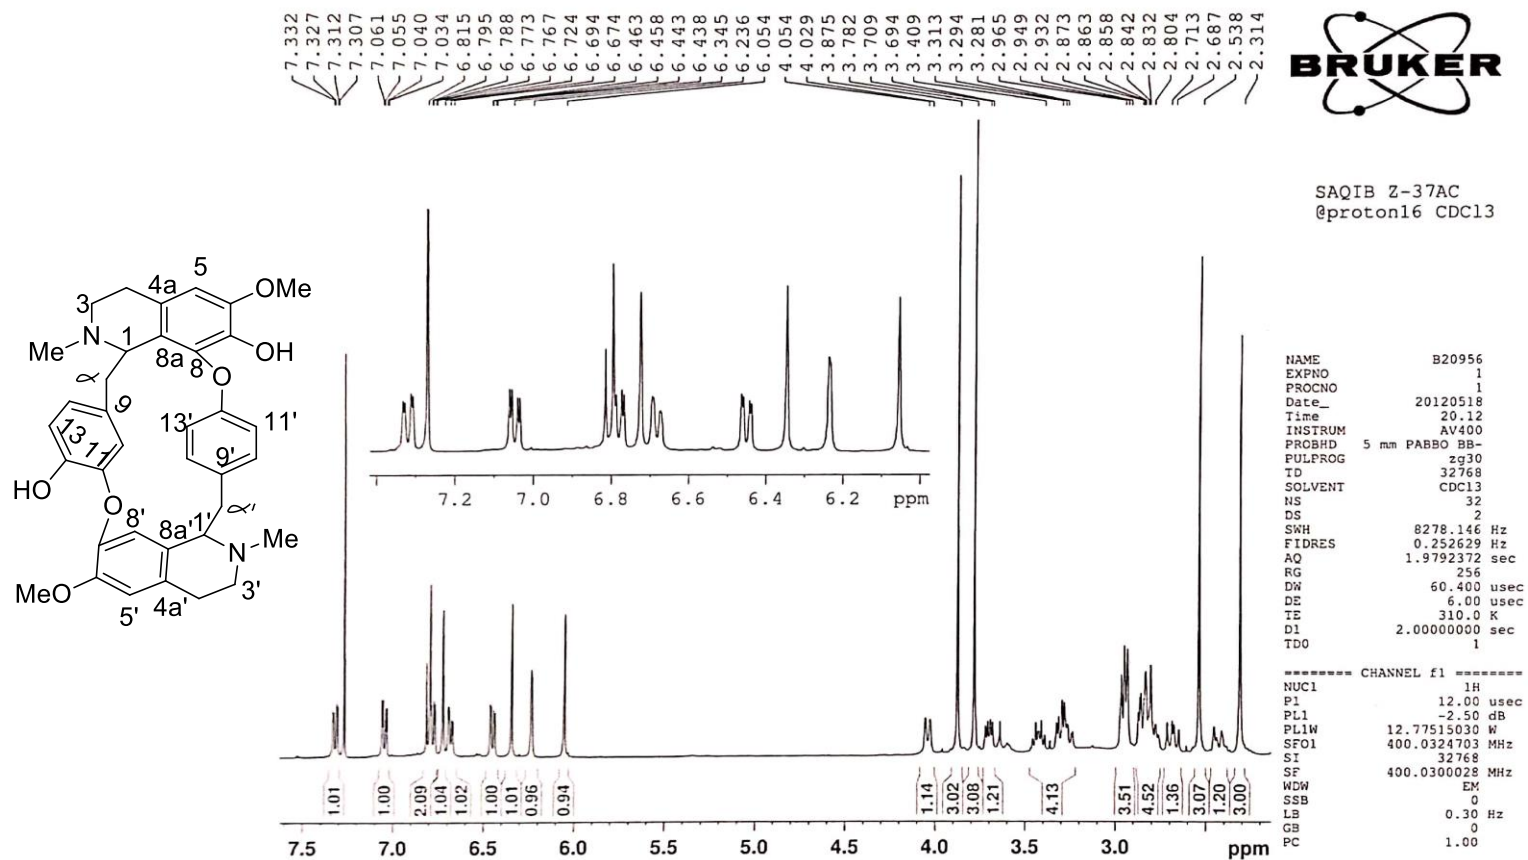

**Figure S20:**  $^1\text{H}$ -NMR Spectrum of Curine (**4**)

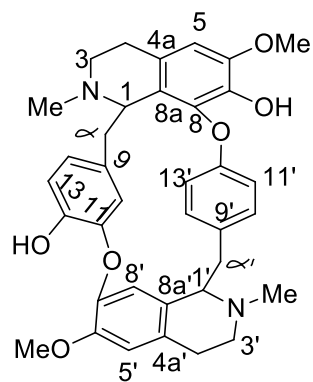

SAQIB Z-37AC @13Cjmod CDCl<sub>3</sub>

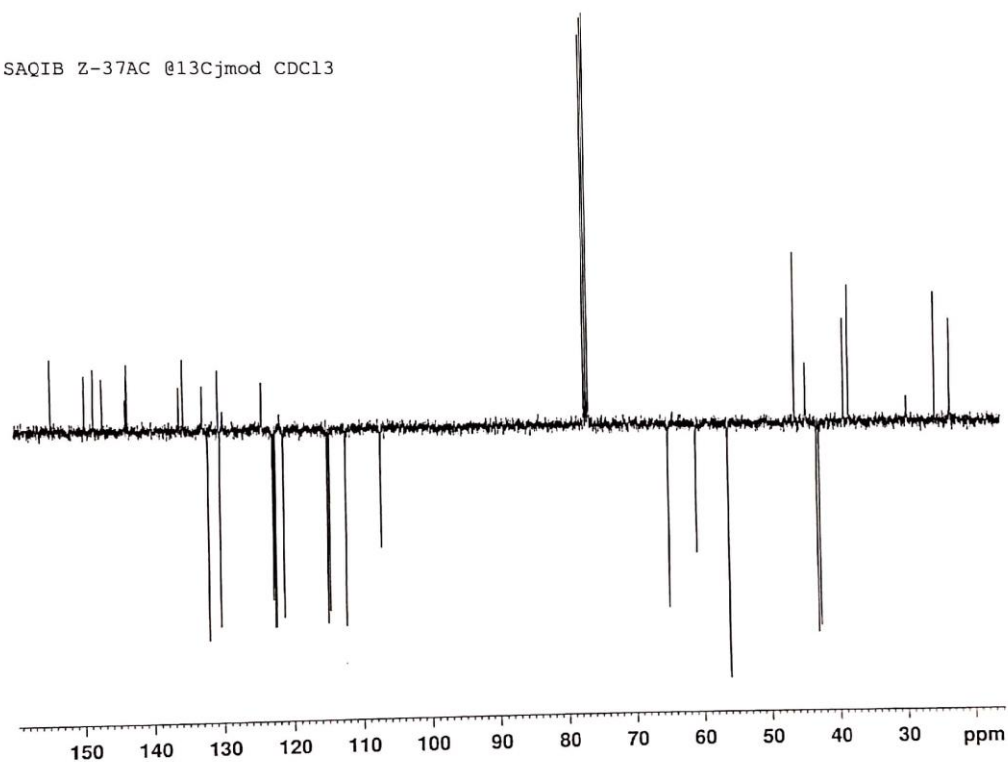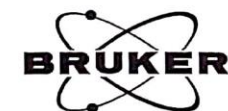

```

NAME          B20956
EXPNO          3
PROCNO         1
Date_          20120518
Time           23.14
INSTRUM        AV400
PROBHD         5 mm PABBO BB-
PULPROG        jmod
TD             16384
SOLVENT        CDCl3
NS             3072
DS             4
SWH            23980.814 Hz
FIDRES         1.463673 Hz
AQ            0.3416564 sec
RG            16384
DW            20.850 usec
DE            20.00 usec
TE            310.0 K
CNST2         145.0000000
CNST11        1.0000000
D1            2.50000000 sec
D2O           0.00689655 sec
TD0           1

===== CHANNEL f1 =====
NUC1           13C
P1             8.00 usec
P2            16.00 usec
PL1           -2.00 dB
PL1W          57.91424179 W
SFO1          100.626115 MHz

===== CHANNEL f2 =====
CPDPRG2       waltz16
NUC2           1H
PCPD2         90.00 usec
P2            -3.20 dB
PL12          14.30 dB
PL2W          15.00949383 W
PL12W         0.26691073 W
SFO2          400.0316001 MHz
SI            32768
SF            100.626115 MHz
WDW           EM
SSB           0
LB            1.00 Hz
GB            0
PC            1.40
  
```

Figure S21: <sup>13</sup>C-NMR Spectrum of Curine (4)

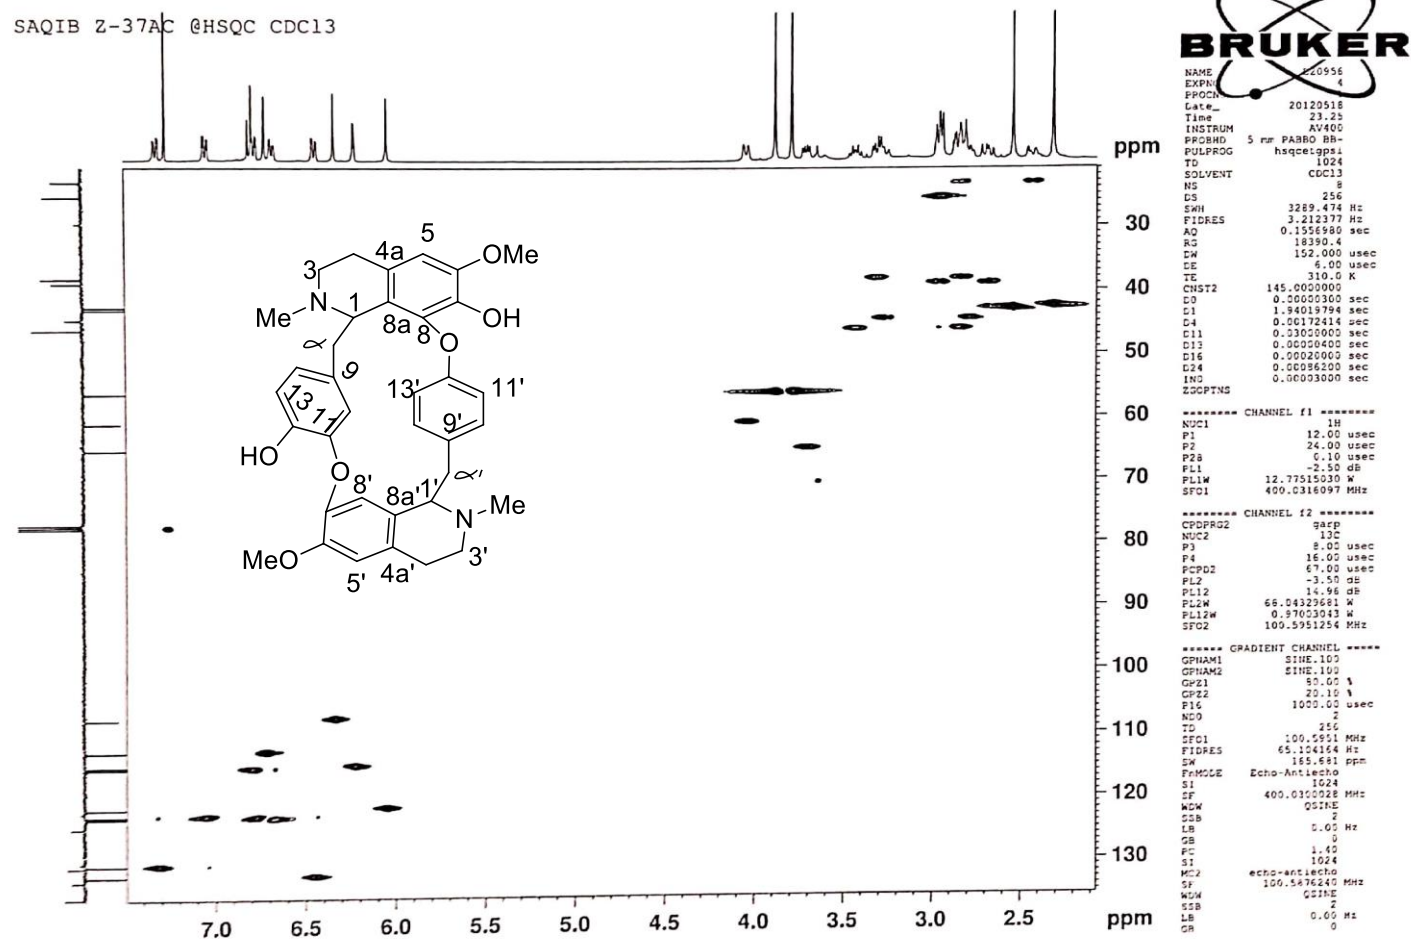

Figure S22: HSQC Spectrum of Curine (4)

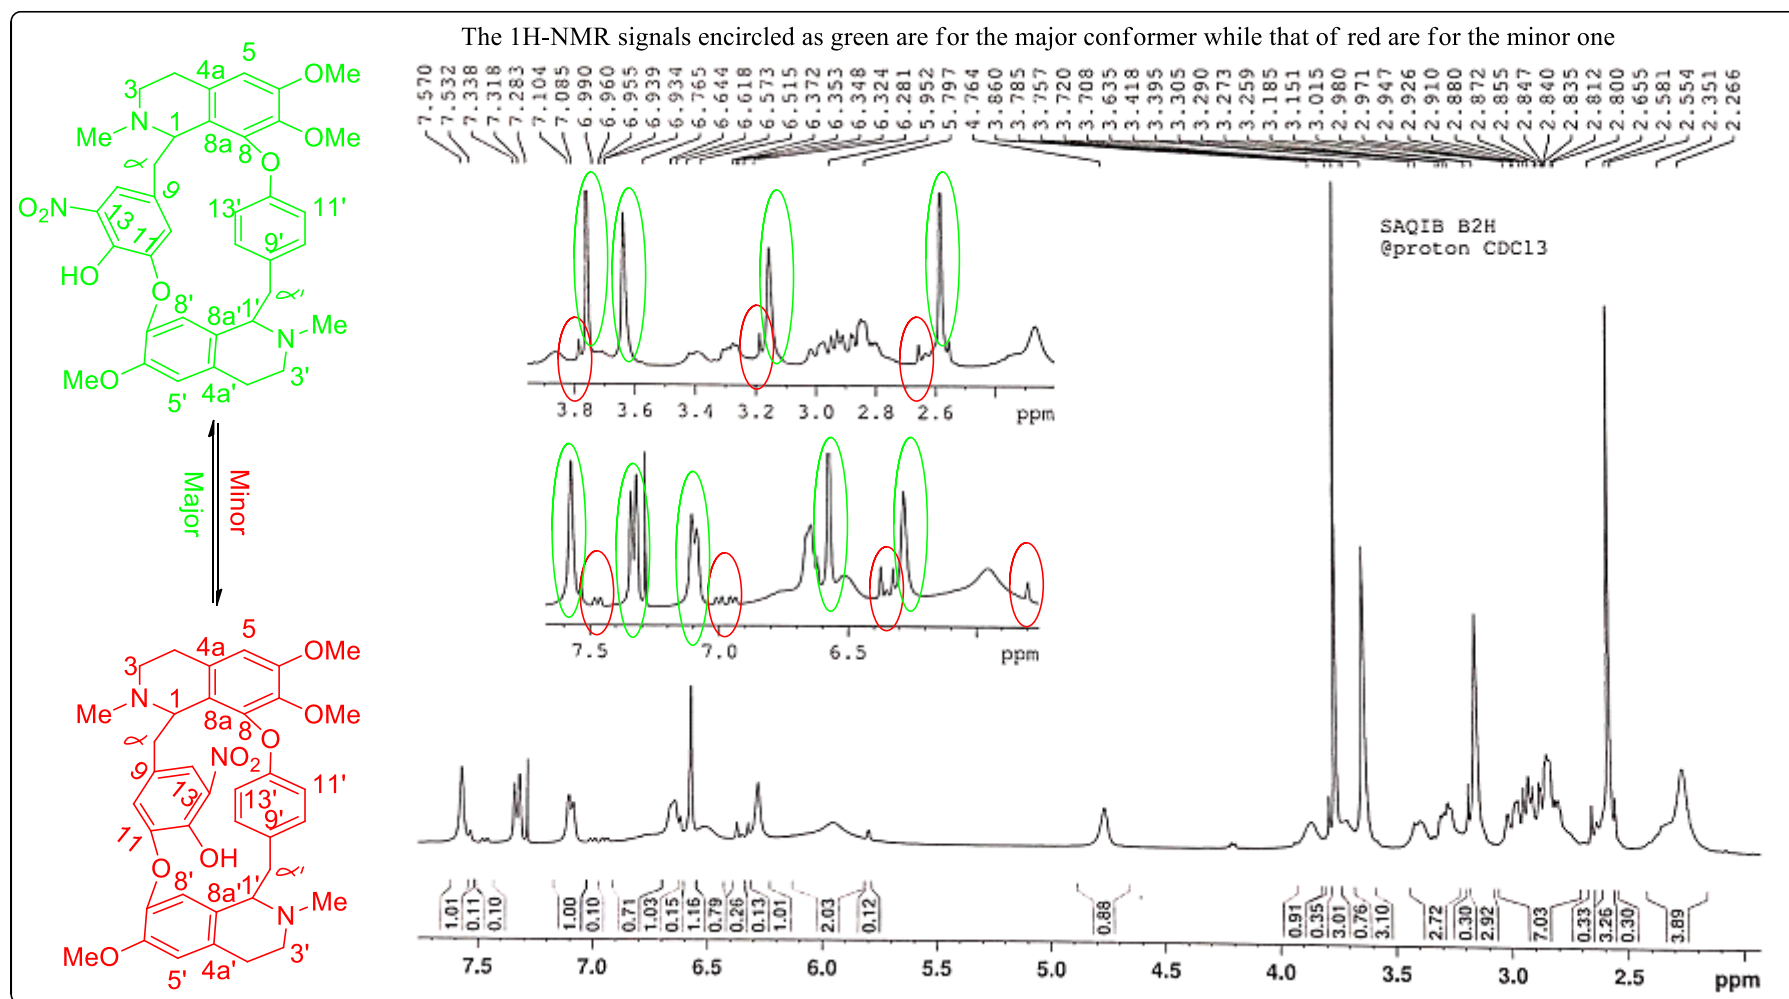

**Figure S23:** The  $^1\text{H}$ -NMR spectrum of 13-nitrochondrofoline (2) in  $\text{CHCl}_3$  at 25 °C showing two conformers one major while other minor
